# Supplementary material for: Macrophage activation by IFN-γ triggers restriction of phagosomal copper from intracellular pathogens
Source: PubMed Central journal article supplement (PMC6277122; doi:10.1371/journal.ppat.1007444), 2018-11-19
Supplement: ppat.1007444.s003.pdf [file ppat.1007444.s003.pdf]

### Supplemental Figure 3

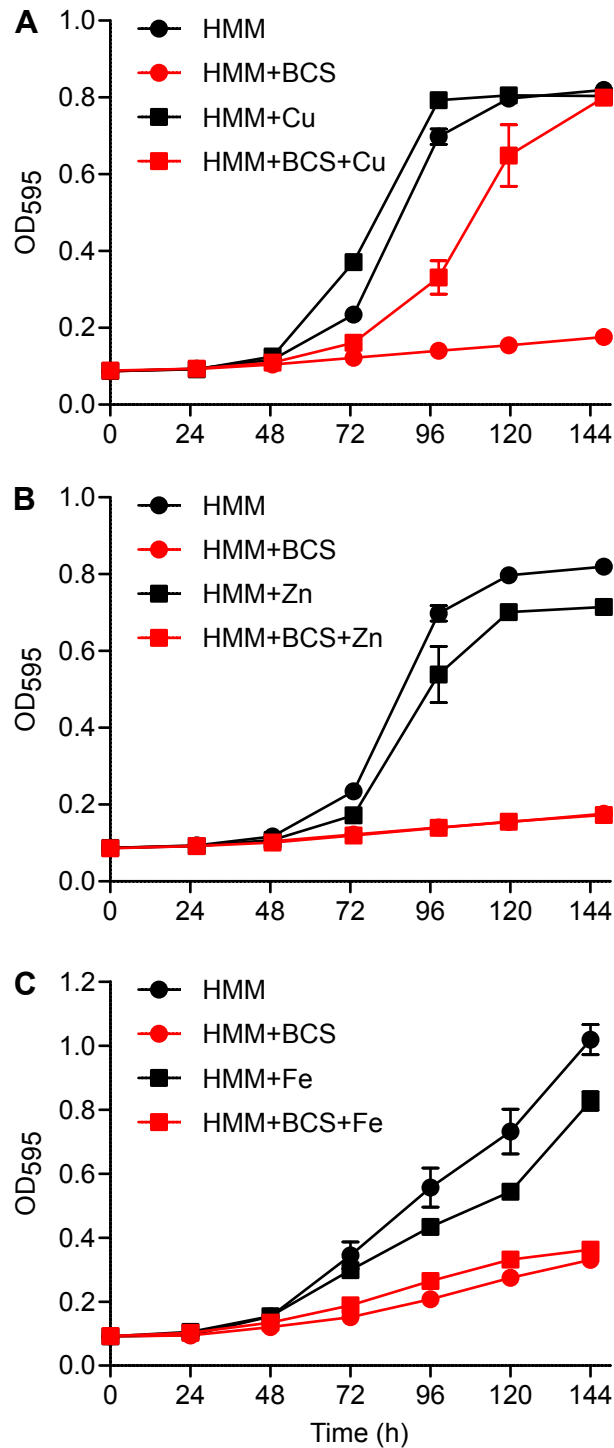

**S3 Fig. BCS cation chelation is specific for copper.** Growth of *Ctr3*-deficient yeasts (*ctr3*) in BCS-containing media with and without supplementation with copper (A), zinc (B) or iron (C). *Ctr3*-deficient yeasts were incubated at 37°C in liquid HMM (black symbols) or HMM containing 100 μM BCS (red symbols) with (squares) and without (circles) 100 μM CuSO<sub>4</sub> (+Cu), 100 μM ZnSO<sub>4</sub> (+Zn) or 100 μM FeSO<sub>4</sub> (+Fe). Yeast growth was monitored by culture turbidity (optical density at 595 nm) over 6 days. Data represent the average growth ± standard deviation among biological replicates (n = 3).
