# Supplementary material for: Macrophage activation by IFN-γ triggers restriction of phagosomal copper from intracellular pathogens
Source: PubMed Central journal article supplement (PMC6277122; doi:10.1371/journal.ppat.1007444), 2018-11-19
Supplement: ppat.1007444.s004.pdf [file ppat.1007444.s004.pdf]

### Supplemental Figure 4

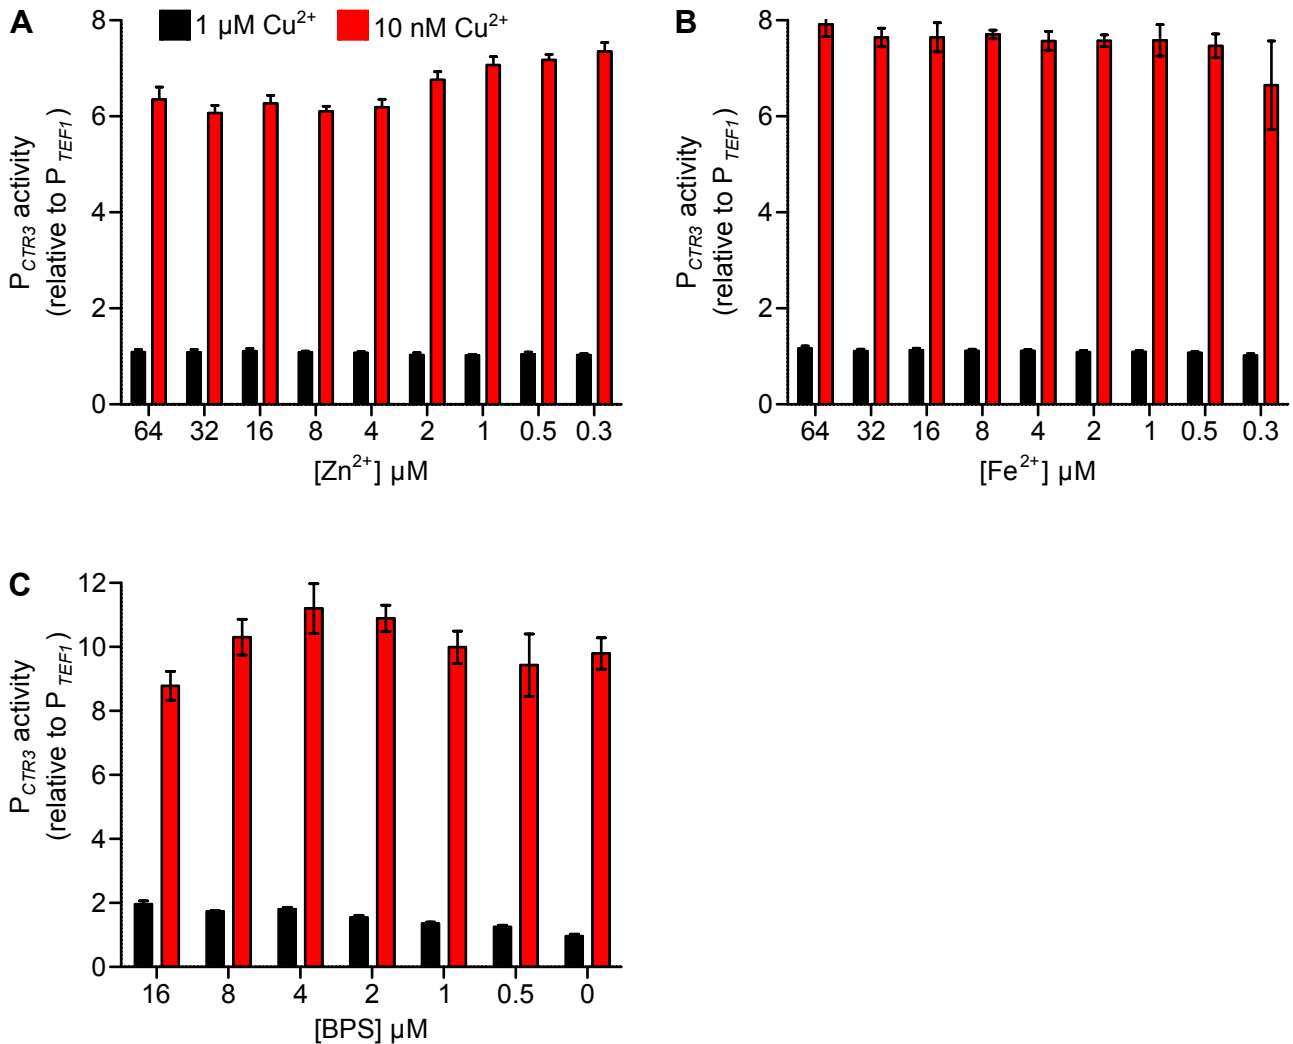

**S4 Fig. Zinc and iron do not regulate the *CTR3* promoter.** *CTR3* promoter activity in 1  $\mu$ M CuSO<sub>4</sub> (low *CTR3* promoter activity, black bars) or 10 nM CuSO<sub>4</sub> (high *CTR3* promoter activity, red bars) with high and low concentrations of zinc (**A**), iron (**B**), or the iron-specific chelator BPS (**C**). **(A)** *H. capsulatum* yeasts were incubated in 3M medium (containing 4  $\mu$ M FeSO<sub>4</sub> and 1  $\mu$ M CuSO<sub>4</sub> or 10 nM CuSO<sub>4</sub>) with different ZnSO<sub>4</sub> concentrations (0.3  $\mu$ M to 64  $\mu$ M). **(B)** *H. capsulatum* yeasts were incubated in 3M medium (containing 4  $\mu$ M ZnSO<sub>4</sub> and 1  $\mu$ M CuSO<sub>4</sub> or 10 nM CuSO<sub>4</sub>) with different FeSO<sub>4</sub> concentrations (0.3  $\mu$ M to 64  $\mu$ M). **(C)** *H. capsulatum* yeasts were incubated in 3M medium (containing 4  $\mu$ M ZnSO<sub>4</sub> and 1  $\mu$ M CuSO<sub>4</sub> or 10 nM CuSO<sub>4</sub>) with different BPS concentrations (0  $\mu$ M to 16  $\mu$ M). The *CTR3* promoter activity was assessed by fluorescence of wild-type yeasts with the *CTR3* promoter-*gfp* fusion ( $P_{CTR3}$ ) after normalization to yeasts with the *TEF1* promoter-*gfp* fusion ( $P_{TEF1}$ ) grown in identical conditions. After 72 hours incubation at 37°C, culture turbidity (optical density at 595nm) and GFP fluorescence (485 nm excitation, 528 emission) were measured. *TEF1* or *CTR3* promoter activity (GFP fluorescence) was normalized to the yeast density (OD<sub>595</sub>) and the *CTR3* promoter activity then compared to that of the constitutively expressed *TEF1* promoter. Data represent the average relative *CTR3* promoter activity  $\pm$  standard deviation among biological replicates (n = 3).
