# Supplementary material for: Macrophage activation by IFN-γ triggers restriction of phagosomal copper from intracellular pathogens
Source: PubMed Central journal article supplement (PMC6277122; doi:10.1371/journal.ppat.1007444), 2018-11-19
Supplement: ppat.1007444.s005.pdf [file ppat.1007444.s005.pdf]

### Supplemental Figure 5

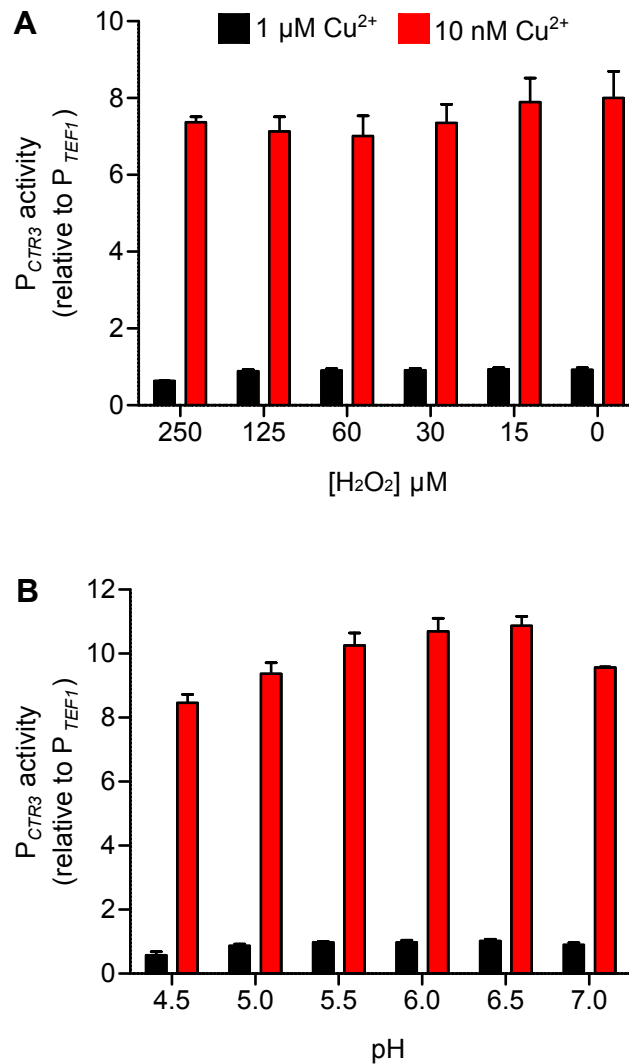

**S5 Fig. Reactive oxygen and pH stresses do not regulate the *CTR3* promoter.** *CTR3* promoter activity in 1 μM CuSO<sub>4</sub> (low *CTR3* promoter activity, black bars) or 10 nM CuSO<sub>4</sub> (high *CTR3* promoter activity, red bars) at a range of H<sub>2</sub>O<sub>2</sub> concentrations (A) or pH (B). (A) *H. capsulatum* yeasts were incubated in 3M medium (containing 1 μM CuSO<sub>4</sub> or 10 nM CuSO<sub>4</sub>) with H<sub>2</sub>O<sub>2</sub> (0 μM to 250 μM). (B) *H. capsulatum* yeasts were incubated in 3M medium (containing 1 μM CuSO<sub>4</sub> or 10 nM CuSO<sub>4</sub>) buffered to different pH with MES (4.5 to 6.0) or HEPES (6.5 to 7.0). The *CTR3* promoter activity was assessed by fluorescence of wild-type yeasts with the *CTR3* promoter-*gfp* fusion (*P<sub>CTR3</sub>*) after normalization to yeasts with the *TEF1* promoter-*gfp* fusion (*P<sub>TEF1</sub>*) grown in identical conditions. After 72 hours incubation at 37°C, culture turbidity (optical density at 595nm) and GFP fluorescence (485 nm excitation, 528 emission) were measured. *TEF1* or *CTR3* promoter activity (GFP fluorescence) was normalized to the yeast density (OD<sub>595</sub>) and the *CTR3* promoter activity then compared to that of the constitutively expressed *TEF1* promoter. Data represent the average relative *CTR3* promoter activity ± standard deviation among biological replicates (n = 3).
