# Supplementary material for: Macrophage activation by IFN-γ triggers restriction of phagosomal copper from intracellular pathogens
Source: PubMed Central journal article supplement (PMC6277122; doi:10.1371/journal.ppat.1007444), 2018-11-19
Supplement: ppat.1007444.s006.pdf [file ppat.1007444.s006.pdf]

Supplemental Figure 6

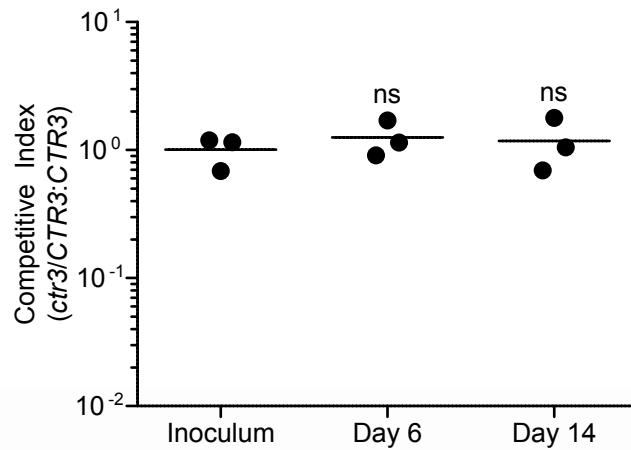

**S6 Fig. *CTR3* complementation of the *ctr3* mutant rescues the *ctr3* fitness in vivo.** Wild-type C57BL/6 mice were infected intranasally with  $2 \times 10^4$  yeasts consisting of an equal amount of wild-type *CTR3* (RFP-negative) and *ctr3/CTR3* complemented (RFP-expressing) yeasts. At days 6 and 14 post-infection, the pulmonary fungal burden was measured by collecting lungs and plating lung homogenates on solid media for enumeration of RFP-fluorescent and non-fluorescent colony forming units (CFU). Data points represent the individual ratio of RFP-negative (*CTR3*) yeasts and RFP-fluorescent (*ctr3/CTR3*) yeasts at each time point ( $n = 3$  mice) with horizontal bars representing the average ratio. No significant differences in the ratio of complemented and wild-type yeasts compared to the ratio of the number of yeasts in the inoculum were found by one-tailed Student's *t*-tests.
