# Supplementary material for: Macrophage activation by IFN-γ triggers restriction of phagosomal copper from intracellular pathogens
Source: PubMed Central journal article supplement (PMC6277122; doi:10.1371/journal.ppat.1007444), 2018-11-19
Supplement: ppat.1007444.s007.pdf [file ppat.1007444.s007.pdf]

Supplementary figure 7

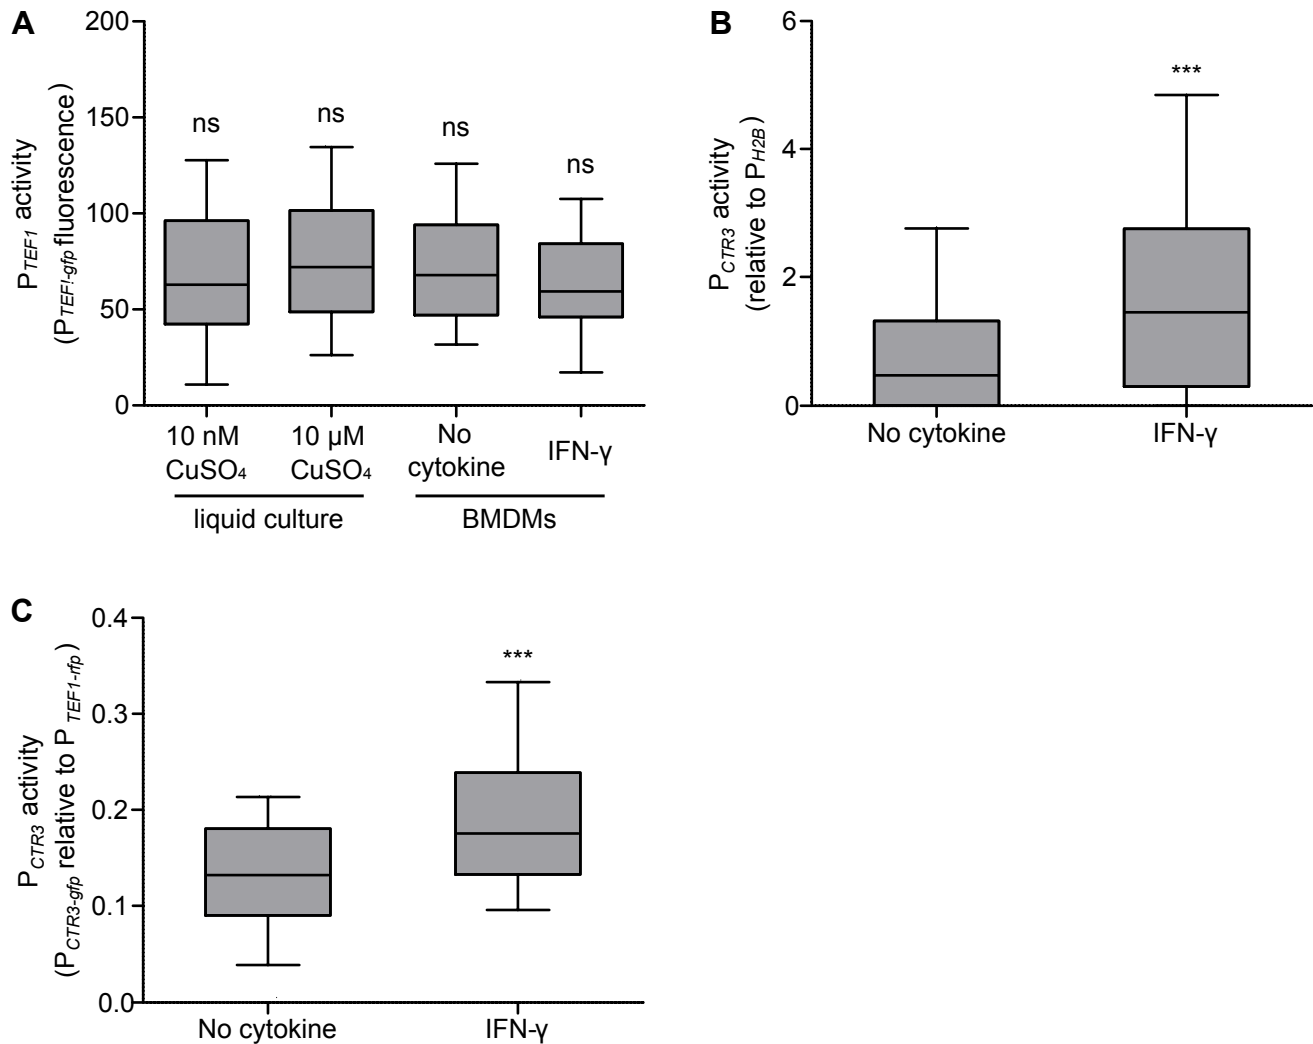

**S7 Fig. IFN- $\gamma$  activates the *CTR3* promoter in intracellular yeasts but not the *TEF1* and *H2B* promoters used for normalization.** *TEF1* (A) promoter activity in liquid culture or BMDMs and *CTR3* (B and C) promoter activity of intracellular *H. capsulatum* yeasts in BMDMs with and without IFN- $\gamma$  activation. (A) *H. capsulatum* *TEF1* promoter activity was measured by fluorescence of the  $P_{TEF1-gfp}$  fusion in yeasts cultured in high (10  $\mu M$ ) or low (10 nM) copper media or in BMDMs with and without activation by IFN- $\gamma$  (1000U/mL). (B) *CTR3* promoter activity of intracellular yeasts was measured by the fluorescence produced by the  $P_{CTR3-gfp}$  reporter after normalization to *H2B* promoter activity ( $P_{H2B-gfp}$ ) of a parallel population of intracellular yeasts. (C) *CTR3* promoter activity of intracellular yeasts was measured by the GFP fluorescence produced by the  $P_{CTR3-gfp}$  reporter fusion after normalization to the RFP fluorescence produced by the  $P_{TEF1-rtfp}$  reporter fusion within the same yeast cells. In all experiments, BMDMs were infected with *H. capsulatum* yeasts (MOI 1:2) and the fluorescence of intracellular yeasts measured after 48 hours by lysis of macrophages, recovery of yeasts, and measurement of GFP or RFP fluorescence in individual yeasts by microscopy ( $n > 100$  yeasts for each sample). Box plots represent quartiles and median fluorescence of the population with lines showing the 10-90% range of the data. Asterisks indicate significant differences in promoter activity compared to non-activated macrophages (\*\*\*  $P < 0.001$ ) using Student's *t*-test and "ns" indicates no significant difference among the experimental groups ( $P > 0.05$ ) using one-way ANOVA with Tukey's Honest Significant Difference test.
