# Supplementary material for: Macrophage activation by IFN-γ triggers restriction of phagosomal copper from intracellular pathogens
Source: PubMed Central journal article supplement (PMC6277122; doi:10.1371/journal.ppat.1007444), 2018-11-19
Supplement: ppat.1007444.s008.pdf [file ppat.1007444.s008.pdf]

## Supplementary figure 8

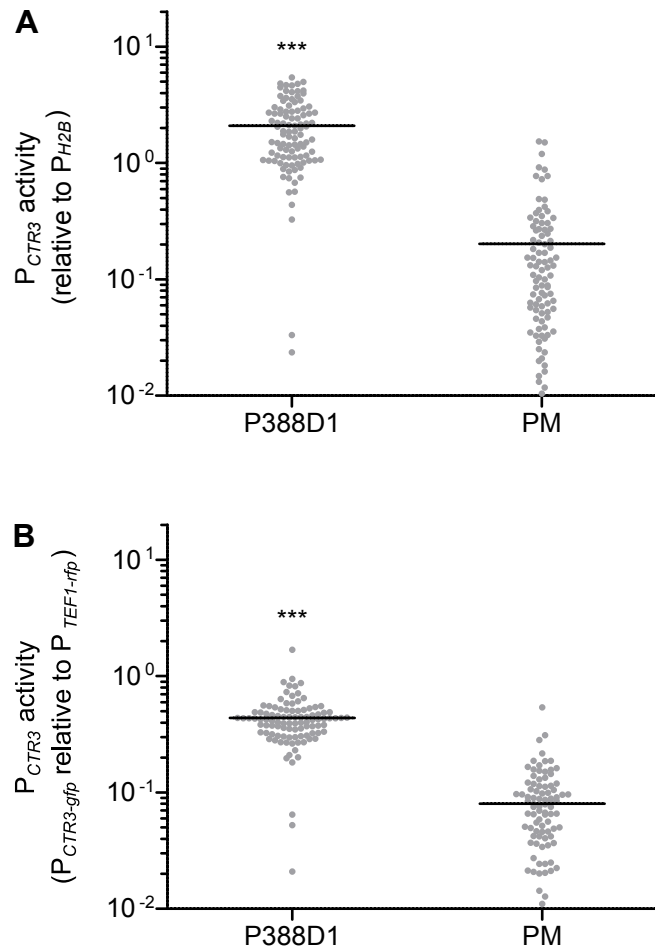

**S8 Fig. Validation of  $CTR3$  promoter activity normalization by housekeeping  $H2B$  and  $TEF1$  promoter activities in yeasts within macrophage cells.**  $CTR3$  promoter activity in P388D1 or peritoneal macrophages following normalization to  $H2B$  (A) or  $TEF1$  (B) promoter activity in separate or the same yeast cells, respectively. Cell line (P388D1) and primary (peritoneal macrophages (PM)) macrophages were infected with *H. capsulatum* yeast (MOI 1:2) and the  $CTR3$  promoter activity of intracellular yeasts measured by fluorescence of the  $P_{CTR3-gfp}$  reporter fusion. (A) Intracellular yeast GFP fluorescence produced by the  $P_{CTR3-gfp}$  reporter fusion was normalized to the GFP fluorescence of a population of  $P_{H2B-gfp}$  reporter fusion yeasts from parallel infections. (B) GFP fluorescence produced by the  $P_{CTR3-gfp}$  reporter fusion was normalized to the RFP fluorescence produced by the  $P_{TEF1-1fp}$  reporter fusion within the same yeast cell. Data points represent the  $CTR3$  promoter activity of individual yeasts ( $n > 100$  for each sample) measured by microscopy of intracellular yeasts recovered after lysis of macrophages. Horizontal bars indicate the population mean. Asterisks (\*\*\*)  $P < 0.001$  indicate significant differences in the  $CTR3$  promoter activity between yeasts recovered from P388D1 cells and from peritoneal macrophages as determined by two-tailed Student's *t*-test.
