# Supplementary material for: Macrophage activation by IFN-γ triggers restriction of phagosomal copper from intracellular pathogens
Source: PubMed Central journal article supplement (PMC6277122; doi:10.1371/journal.ppat.1007444), 2018-11-19
Supplement: ppat.1007444.s009.pdf [file ppat.1007444.s009.pdf]

## Supplemental Table 1: *Histoplasma* Strains

| Strain <sup>1,2</sup> | Genotype <sup>3</sup>                                                                                          | Other Designation                                  |
|-----------------------|----------------------------------------------------------------------------------------------------------------|----------------------------------------------------|
| WU8 <sup>1</sup>      | <i>ura5-32Δ</i>                                                                                                | CTR3                                               |
| WU15 <sup>2</sup>     | <i>ura5-42Δ</i>                                                                                                | CTR3                                               |
| OSU161 <sup>1</sup>   | <i>ura5-32Δ ctr3-1Δ::hph</i>                                                                                   | <i>ctr3</i>                                        |
| OSU189 <sup>1</sup>   | <i>ura5-32Δ zzz::T-DNA(pCR624: URA5, rfp)</i>                                                                  | CTR3                                               |
| OSU190 <sup>1</sup>   | <i>ura5-32Δ ctr3-1Δ::hph zzz::T-DNA(pCR623: URA5, gfp)</i>                                                     | <i>ctr3</i>                                        |
| OSU216 <sup>2</sup>   | <i>ura5-42Δ zzz::T-DNA(pKG06: URA5)</i>                                                                        | CTR3                                               |
| OSU233 <sup>2</sup>   | <i>ura5-42Δ zzz::pQS01(apt3, P<sub>TEF1</sub>-rfp)</i>                                                         | CTR3                                               |
| OSU264 <sup>2</sup>   | <i>ura5-42Δ zzz::pCR628 (URA5, P<sub>H2B</sub>-gfp)</i>                                                        | <i>P<sub>H2B</sub>-gfp</i>                         |
| OSU296 <sup>2</sup>   | <i>ura5-42Δ zzz::pQS01(apt3, P<sub>TEF1</sub>-rfp) zzz::T-DNA(pKG06: URA5)</i>                                 | CTR3                                               |
| OSU310 <sup>2</sup>   | <i>ura5-42Δ zzz::pQS01(apt3, P<sub>TEF1</sub>-rfp) ctr3-2::T-DNA(pBHt2: hph)</i>                               | <i>ctr3</i>                                        |
| OSU311 <sup>2</sup>   | <i>ura5-42Δ zzz::pQS01(apt3, P<sub>TEF1</sub>-rfp) ctr3-3::T-DNA(pBHt2: hph)</i>                               | <i>ctr3</i>                                        |
| OSU315 <sup>2</sup>   | <i>ura5-42Δ zzz::pQS01(apt3, P<sub>TEF1</sub>-rfp) ctr3-2::T-DNA(pBHt2: hph) zzz::T-DNA(pCR628: URA5, gfp)</i> | <i>ctr3</i>                                        |
| OSU316 <sup>2</sup>   | <i>ura5-42Δ zzz::pQS01(apt3, P<sub>TEF1</sub>-rfp) ctr3-2::T-DNA(pBHt2: hph) zzz::T-DNA(pDT06: URA5, CTR3)</i> | <i>ctr3/CTR3</i>                                   |
| OSU317 <sup>2</sup>   | <i>ura5-42Δ zzz::pQS01(apt3, P<sub>TEF1</sub>-rfp) ctr3-3::T-DNA(pBHt2: hph) zzz::T-DNA(pCR628: URA5, gfp)</i> | <i>ctr3</i>                                        |
| OSU318 <sup>2</sup>   | <i>ura5-42Δ zzz::pQS01(apt3, P<sub>TEF1</sub>-rfp) ctr3-3::T-DNA(pBHt2: hph) zzz::T-DNA(pDT06: URA5, CTR3)</i> | <i>ctr3/CTR3</i>                                   |
| OSU326 <sup>2</sup>   | <i>ura5-42Δ zzz::T-DNA(pCR623: URA5, P<sub>TEF1</sub>-gfp)</i>                                                 | <i>P<sub>TEF1</sub>-gfp</i>                        |
| OSU327 <sup>2</sup>   | <i>ura5-42Δ zzz::T-DNA(pMK32: URA5, P<sub>CTR3</sub>-gfp)</i>                                                  | <i>P<sub>CTR3</sub>-gfp</i>                        |
| OSU373 <sup>2</sup>   | <i>ura5-42Δ zzz::pQS01 (G418, P<sub>TEF1</sub>-RFP) zzz:pMK32(URA5, P<sub>CTR3</sub>-gfp)</i>                  | <i>P<sub>CTR3</sub>-gfp / P<sub>TEF1</sub>-rfp</i> |

<sup>1,2</sup> strains were constructed in the *Histoplasma* <sup>1</sup>G186A (ATCC 26029) or <sup>2</sup>G217B (ATCC 26032) backgrounds

<sup>3</sup> gene designations:

*zzz::T-DNA*: T-DNA integration at an undetermined chromosomal location

*hph*: hygromycin B phosphotransferase (hygromycin resistance)

*apt3*: aminoglycoside phosphotransferase (G418 resistance)

*gfp*: green-fluorescence protein

*rfp*: red-fluorescence protein (tdTomato)

*CTR3*: copper transporter

*H2B*: histone 2B

*TEF1*: translation elongation factor EF-1 $\alpha$

*URA5*: orotate phosphoribosyltransferase
